# Supplementary material
Source: PubMed Central journal article supplement (PMC1239934)

Supplementary Figure 2

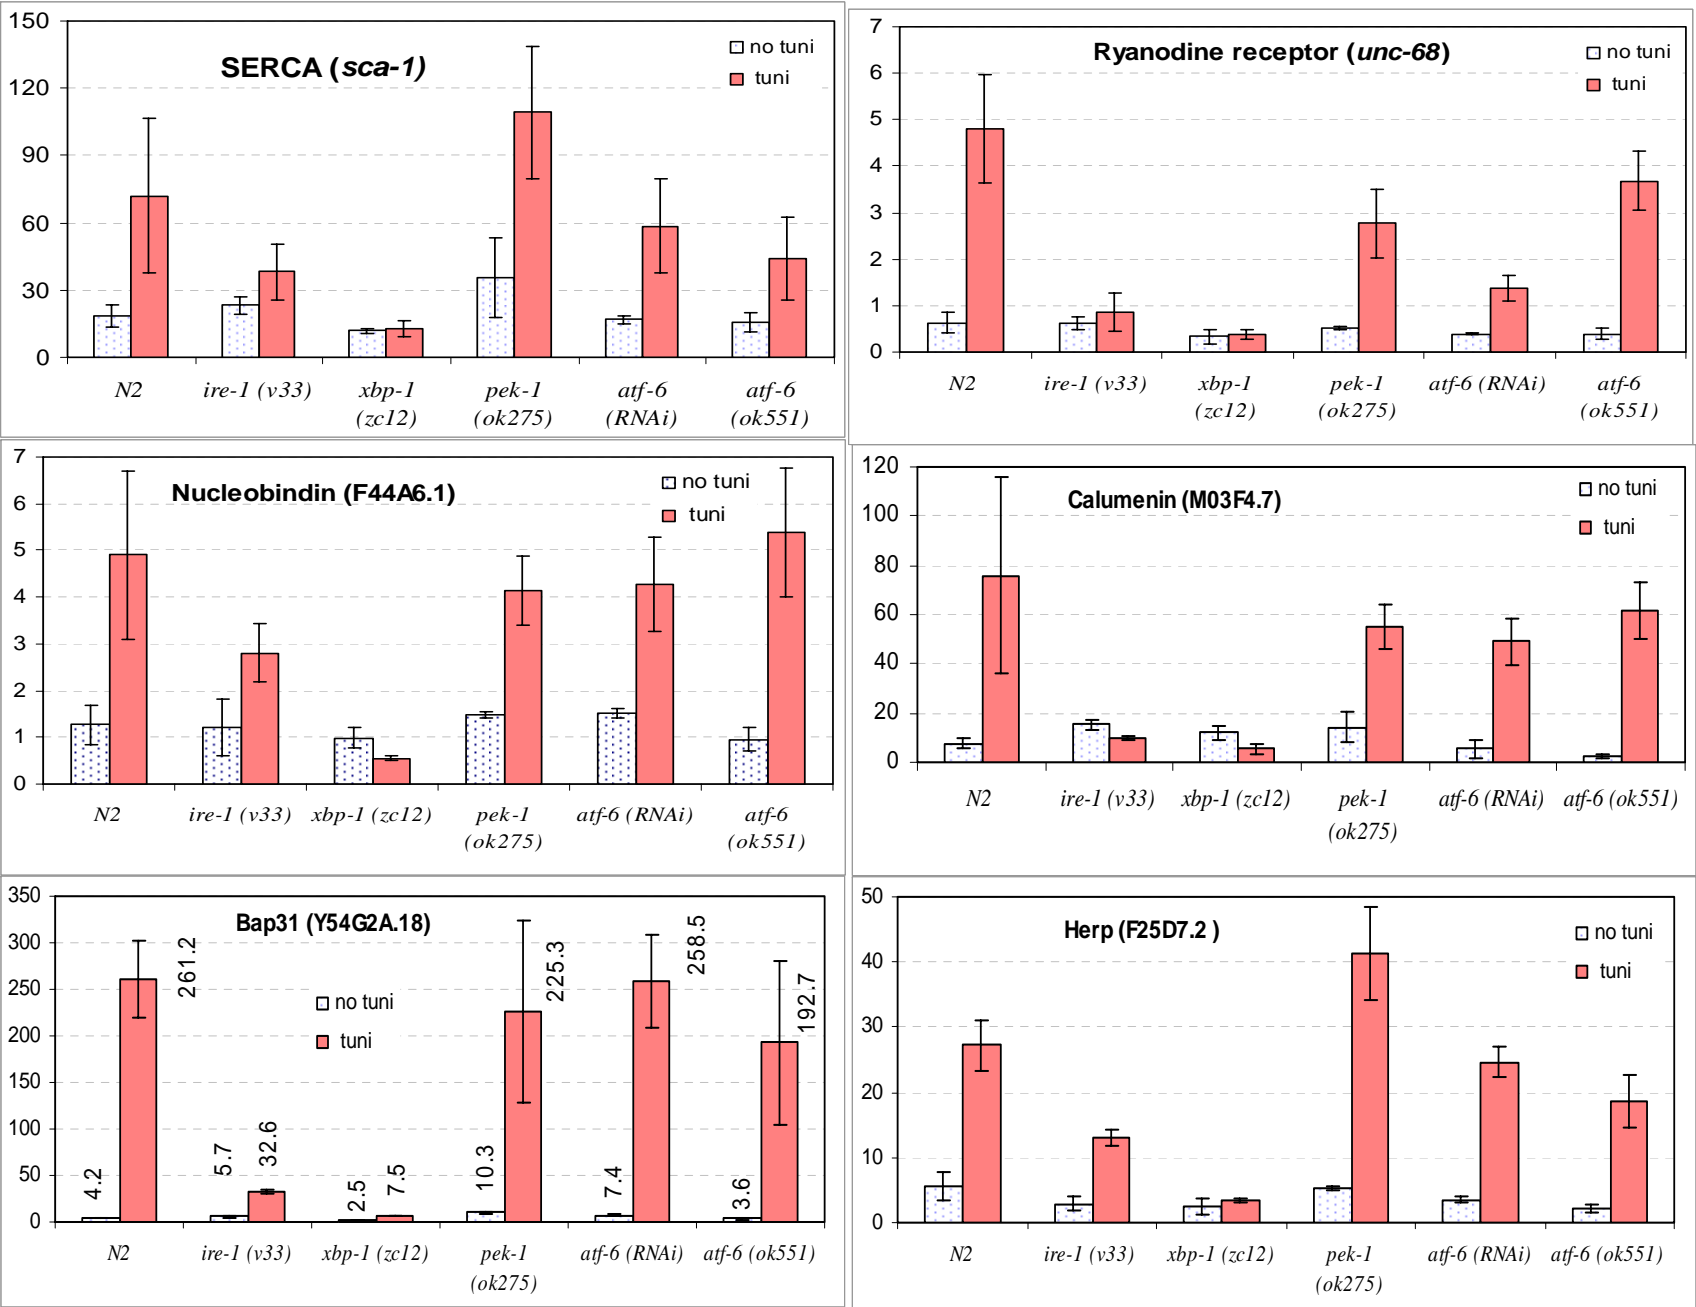

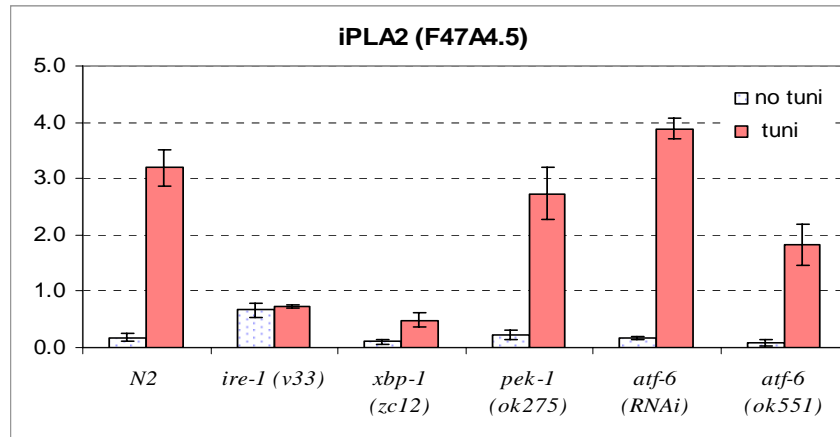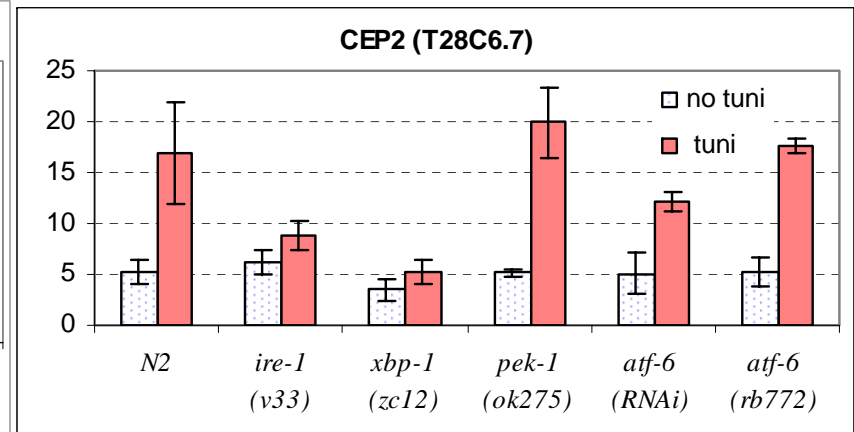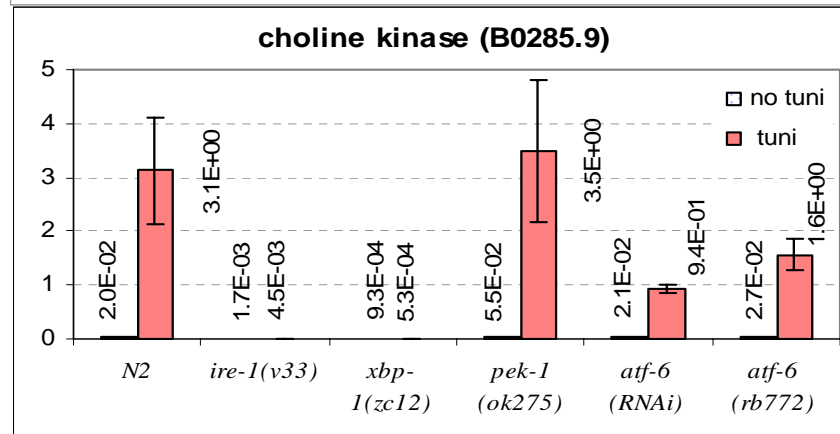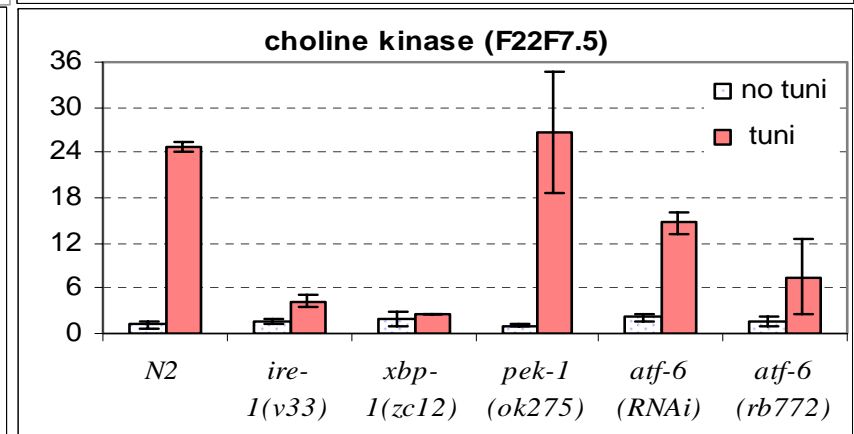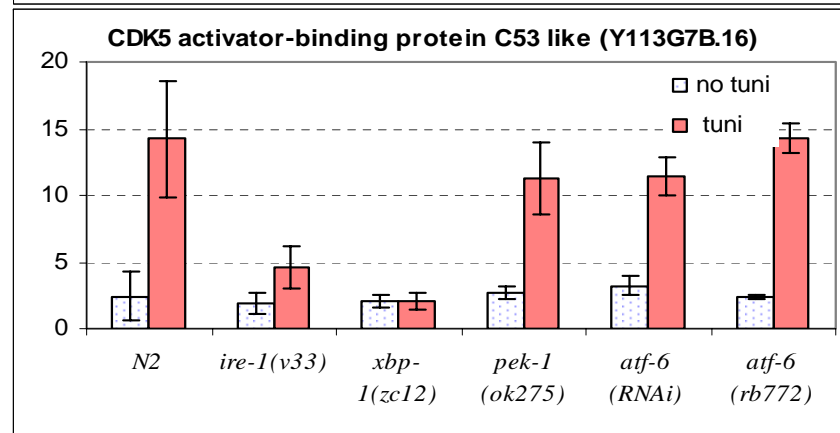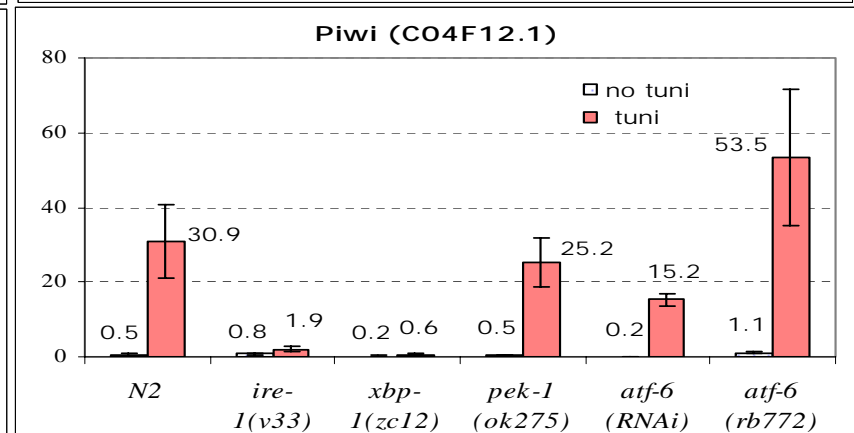

**DER-1**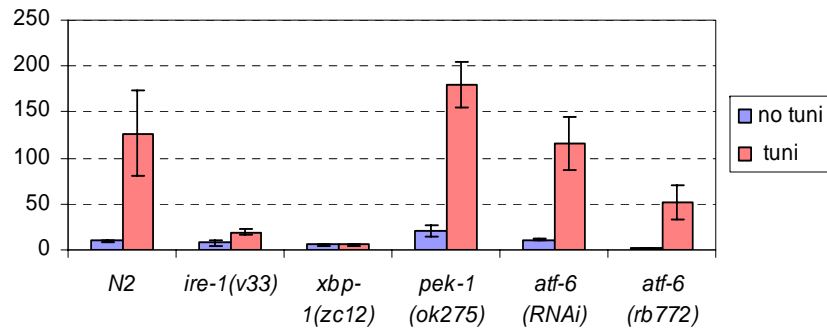**ERp72 (C14B9.2)**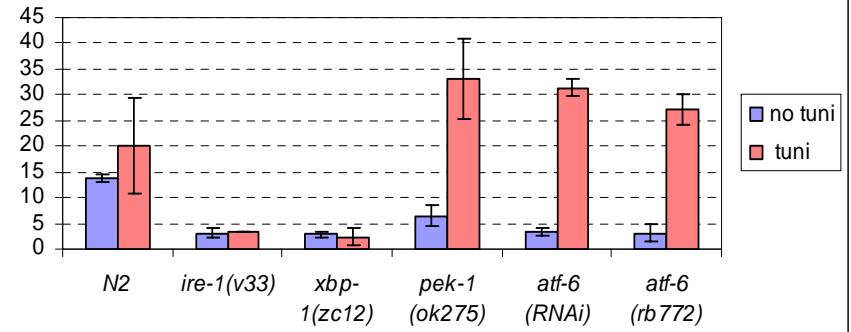**P97 (C41C4.8)**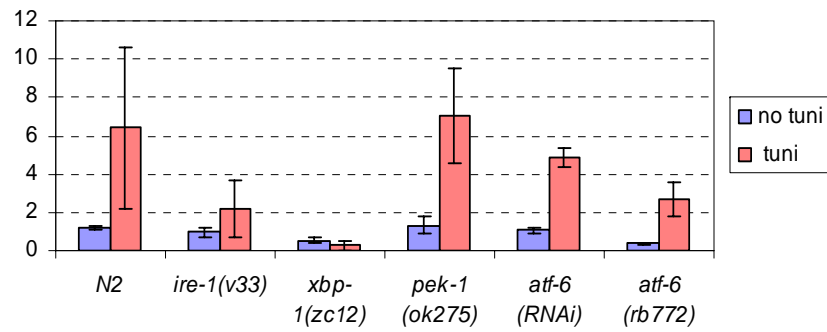**NSF-1**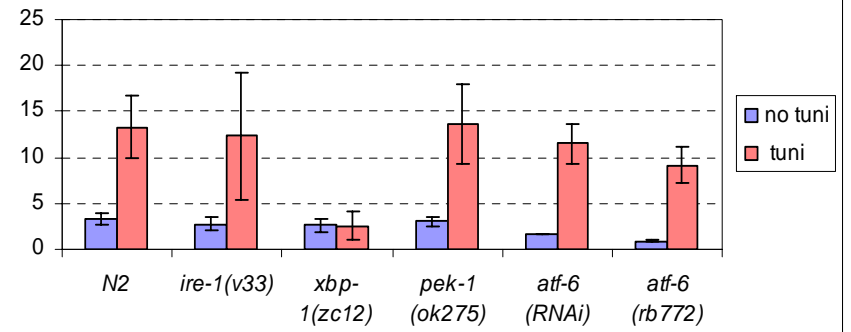**ARF GAP (K02B12.7)**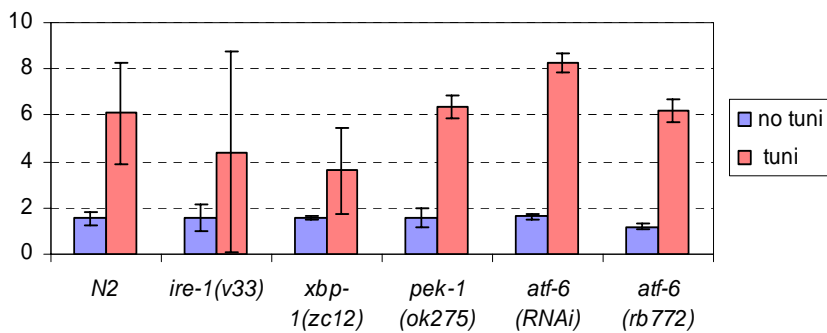**ARL-1.1**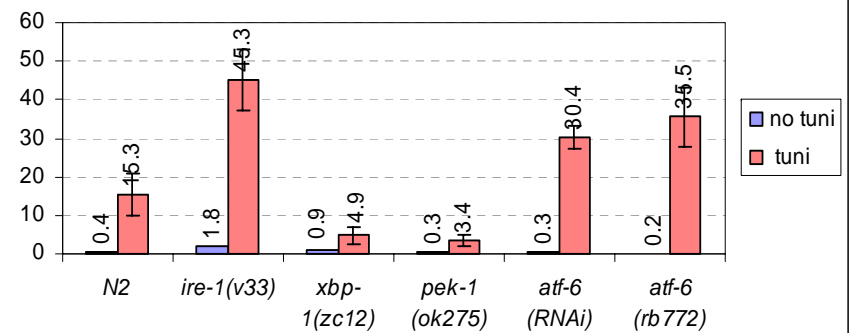

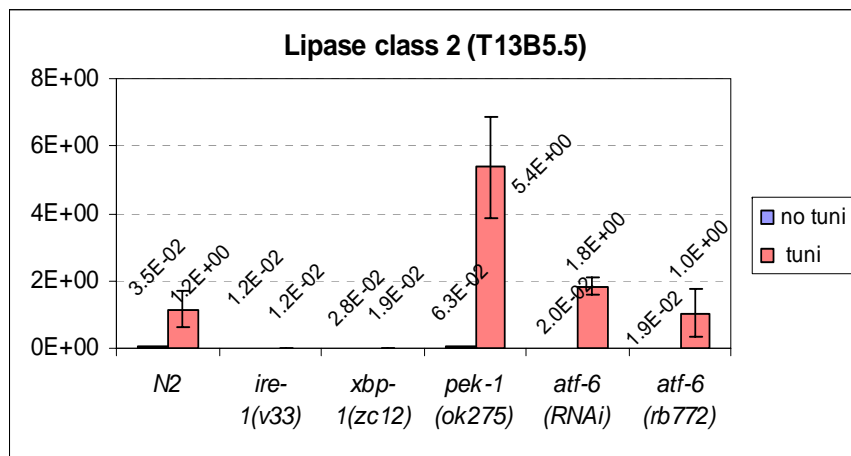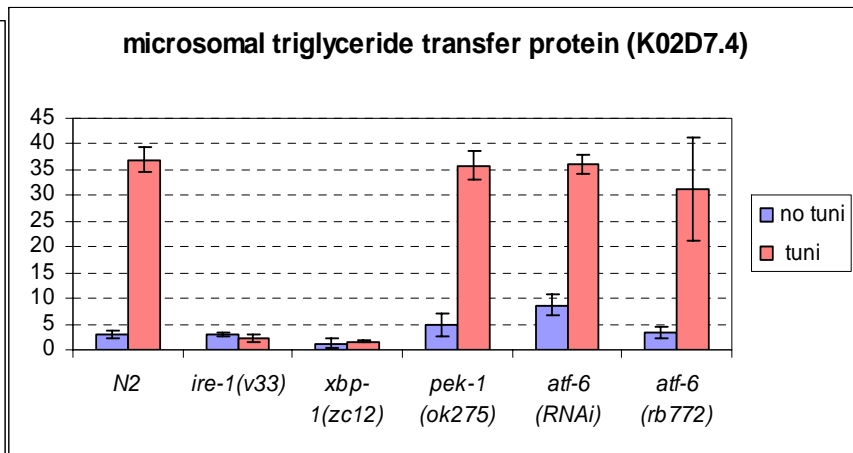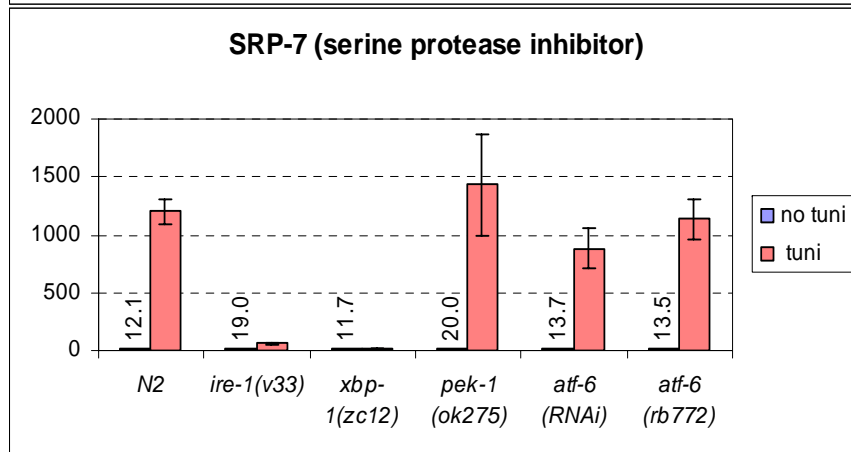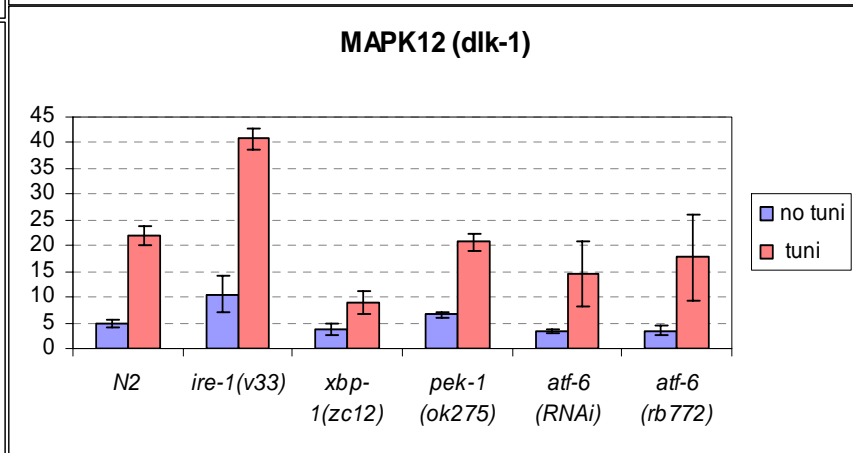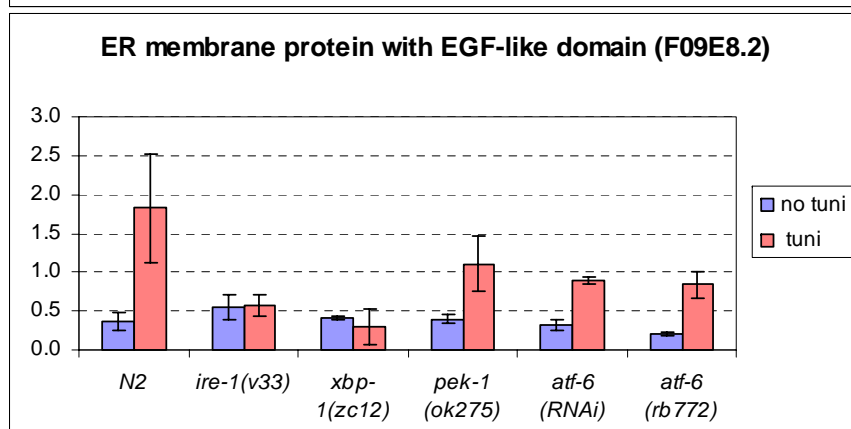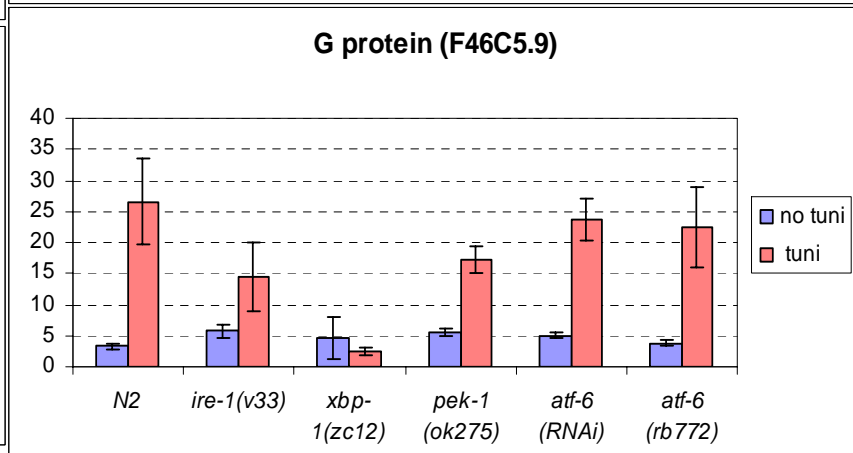

**essential RNA binding protein (R07E5.12)**

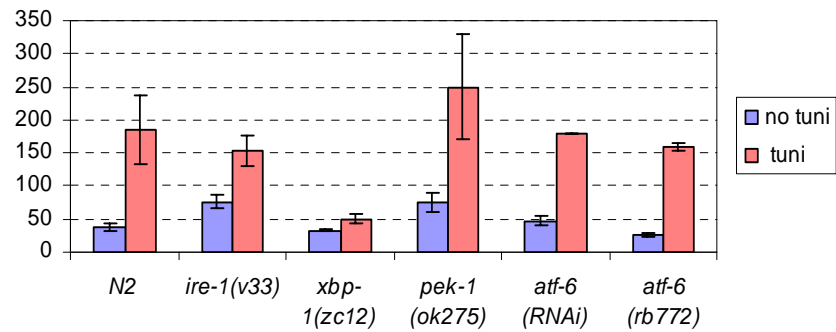

**RNA binding protein (Y41E3.8)**

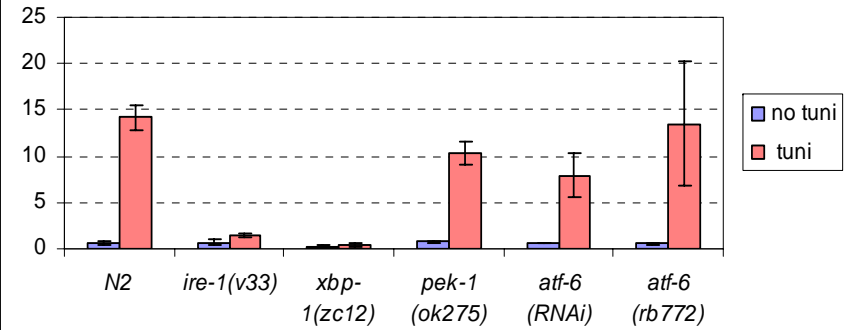

**hsp70 (Orp150, T14G8.3)**

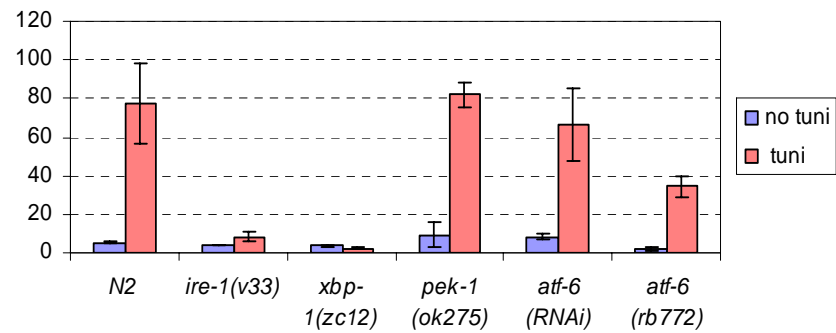

**protein transporter (Y105E8A.2)**

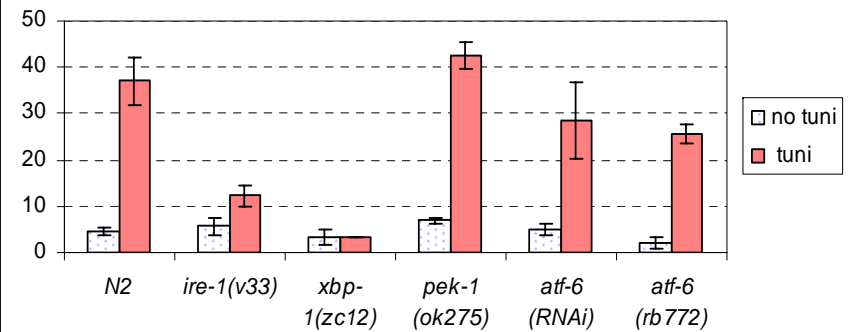

**Zinc finger protein (Y38F1.2)**

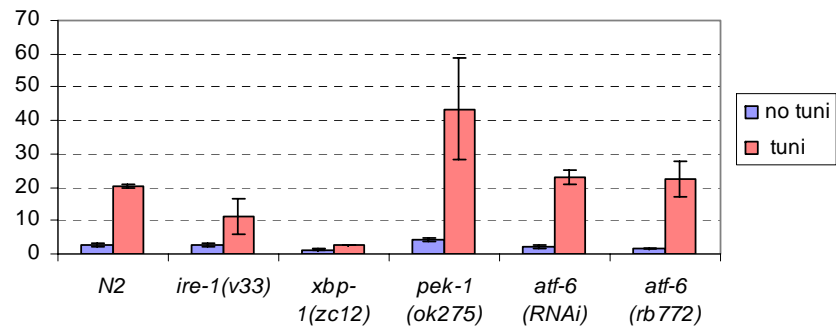

**DHHC Zinc finger protein (K02G10.1)**

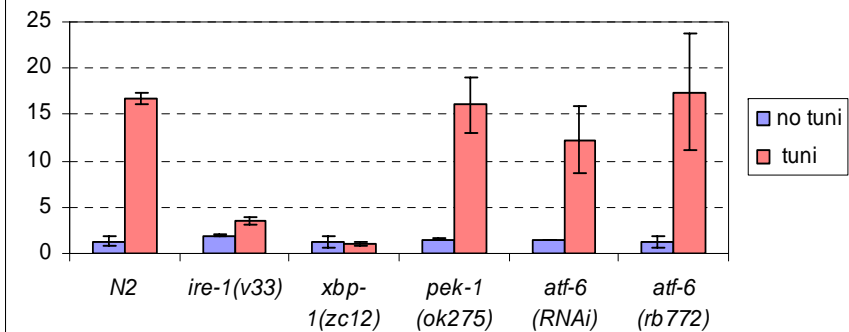

Supplement: pgen.0010037.sg002.pdf [file pgen.0010037.sg002.pdf]
