# Supplementary material
Source: PubMed Central journal article supplement (PMC1239934)
Supplement: pgen.0010037.sg001.pdf [file pgen.0010037.sg001.pdf]

Supplemental Figure 1

A

| tunicamycin<br>5 ug/ml | <i>atf-6(ok551)</i> |     |     | N2  |     |     |
|------------------------|---------------------|-----|-----|-----|-----|-----|
|                        | a                   | b   | c   | a   | b   | c   |
| eggs laid              | 263                 | 393 | 457 | 288 | 479 | 602 |
| addults                | 153                 | 150 | 68  | 76  | 134 | 138 |
| percentage             | 58%                 | 38% | 15% | 26% | 28% | 23% |

B

| tunicamycin<br>7.5 ug/ml | <i>atf-6(ok551)</i> |     | N2  |     |
|--------------------------|---------------------|-----|-----|-----|
|                          | a                   | b   | a   | b   |
| eggs laid                | 178                 | 386 | 174 | 338 |
| addults                  | 23                  | 30  | 4   | 5   |
| percentage               | 13%                 | 8%  | 2%  | 1%  |
