# Supplementary material
Source: PubMed Central journal article supplement (PMC1239934)

Supplementary Figure 3

A. *pek-1* promoted GFP

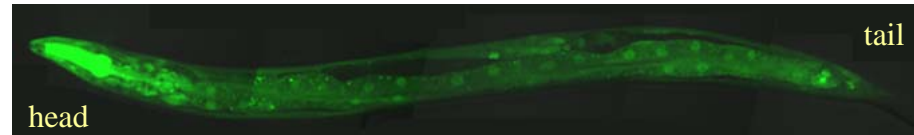

B. *atf-6* promoted GFP

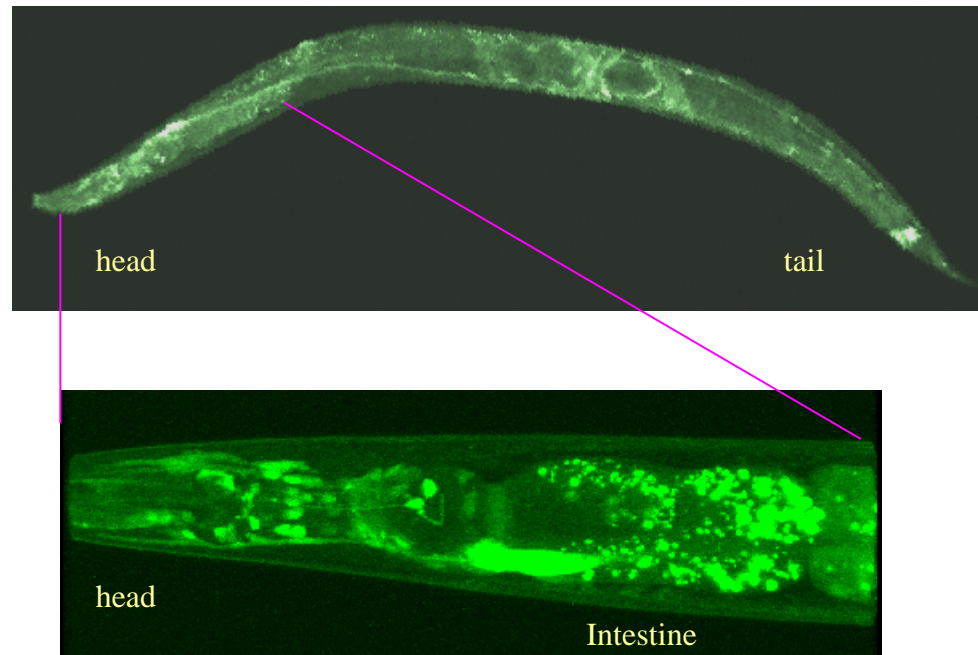

Supplement: pgen.0010037.sg003.pdf [file pgen.0010037.sg003.pdf]

Supplemental Figure 3C

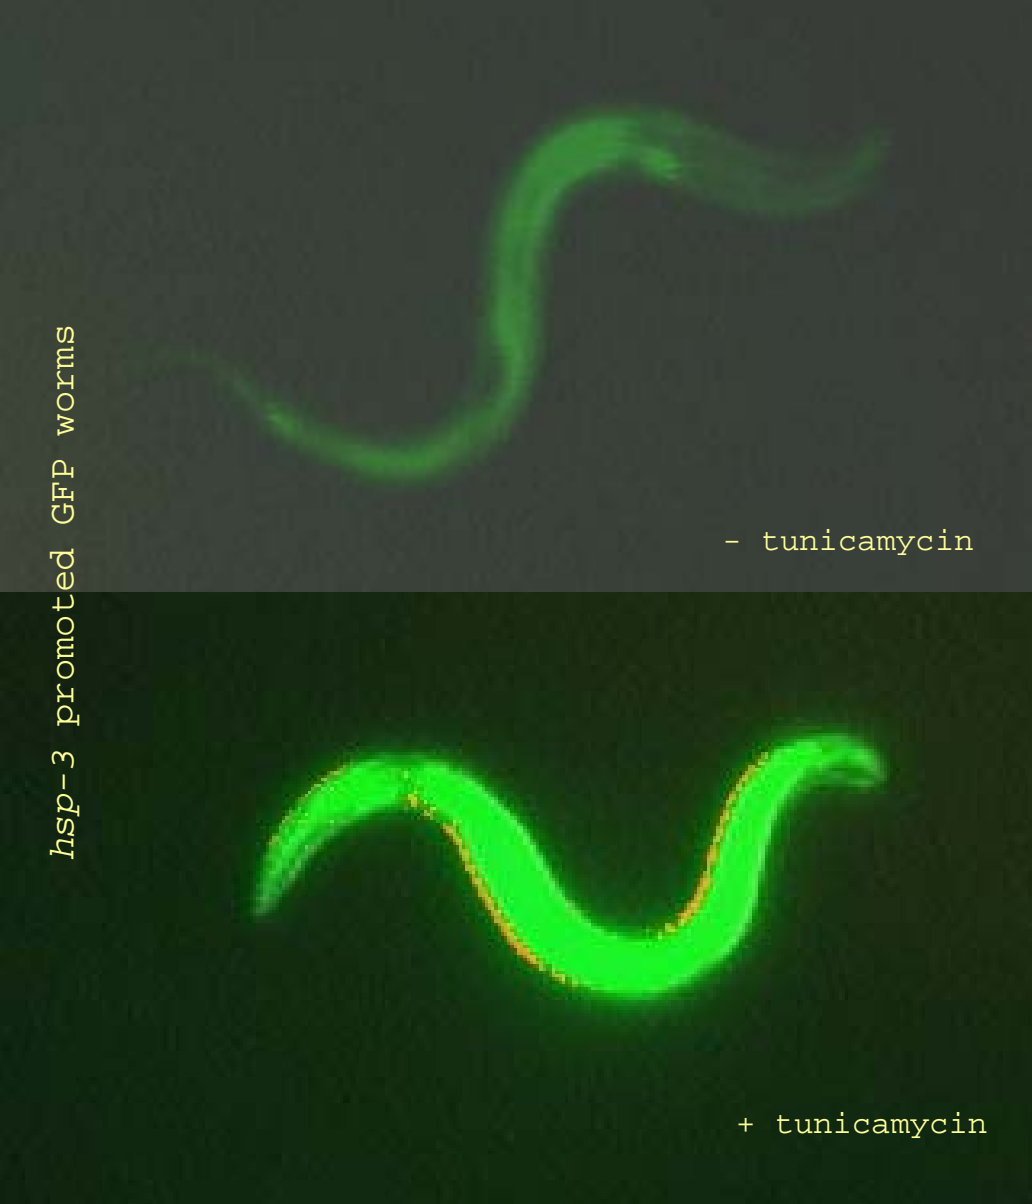

Supplement: pgen.0010037.sg004.pdf [file pgen.0010037.sg004.pdf]
